# Supplementary material
Source: PubMed Central journal article supplement (PMC4048835)
Supplement: NIHMS58296-supplement-1.pdf [file NIHMS58296-supplement-1.pdf]

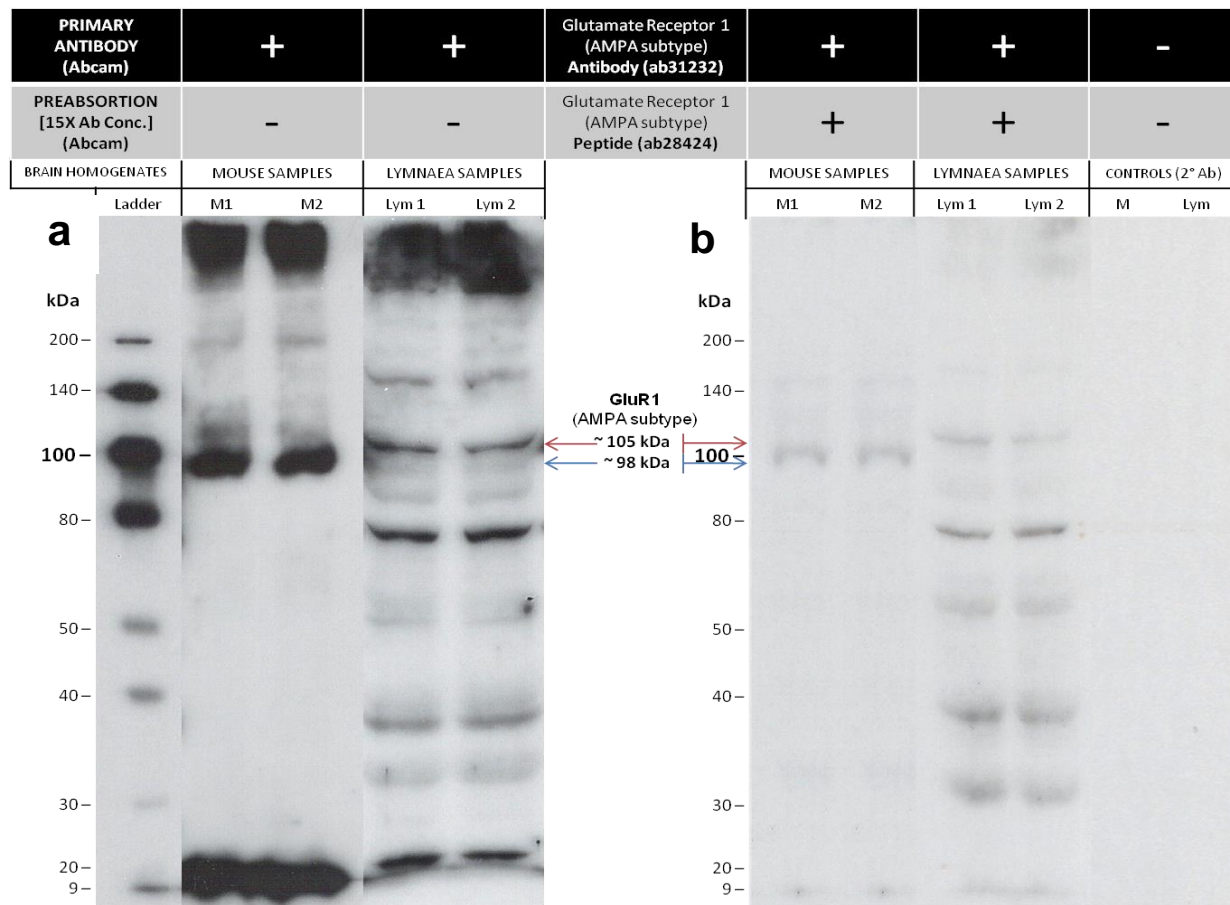

**Supplementary Figure 1. Western blot detection of mouse GluA1 and Lym-eGluR1<sup>1,2</sup> (with a rabbit GluA1 antibody [ab31232], and the specificity of detection.** A set of mouse (M1, M2 and M) and *Lymnaea* (Lym1, Lym2 and Lym) protein samples were resolved by SDS-PAGE (8.25 %) and electroblotted onto PVDF membrane. **(a)** The primary antibody detected a very prominent band of ~ 98 kDa in the mouse samples (M1 and M2). Although the same band is also detectable in *Lymnaea* samples (Lym1 and Lym2, blue arrow), it is very low in intensity compared to the band expressed at ~105 kDa (red arrow). **(b)** Pre-incubation with the corresponding synthetic peptide [AB28424] most strongly suppressed the expression of the ~105 kDa and ~98 kDa bands in the *Lymnaea* samples (Lym1 and Lym2), and almost completely suppressed the ~98 kDa band in the mouse samples (M1 and M2). Controls not exposed to primary antibody or synthetic peptide showed no band expression in either sample.

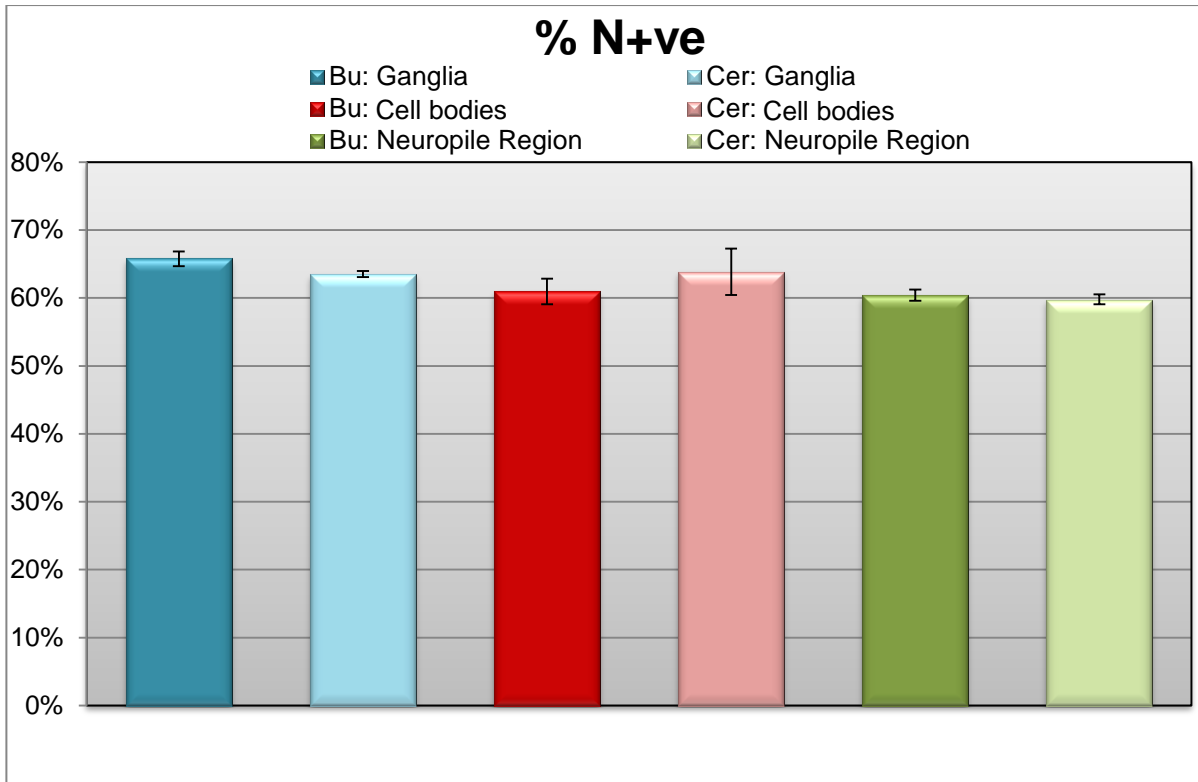

**Supplementary Figure 2. Results of the intensity correlation analysis (ICA) of Glu-A1 and PSD-95 co-localization.** Means ( $\pm$ SEM) percentage values of green (GluA1) and red (PSD-95) pixel pairs that have only positive PDM (Product of Differences from the Mean) values, over the total number of pixel pairs (%N+ve) is shown.

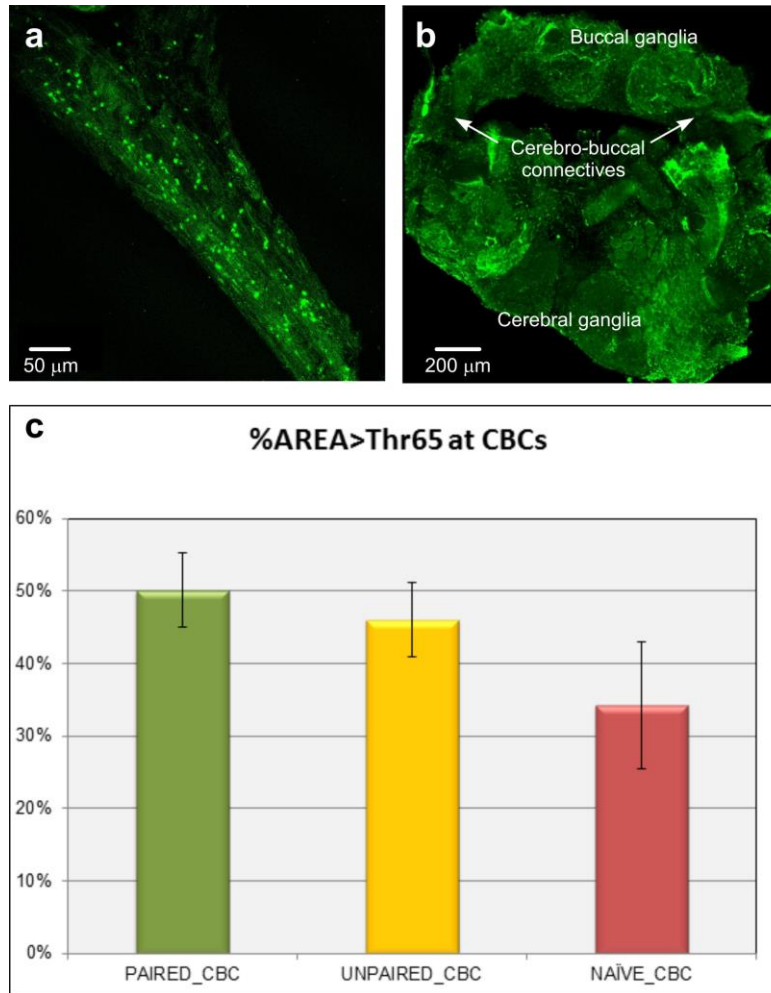

**Supplementary Figure 3. GluA1 receptor expression in the cerebro-buccal connective and connective tissue surrounding the 'learning ganglia'.** (a) Glu-A1 immunoreactive punctae in the cerebro-buccal connective (CBC). (b) Glu-A1 immunoreactivity in the connective tissue surrounding the buccal and cerebral ganglia interconnected by the cerebro-buccal connectives. This image is from a whole-mount preparation. Please note that the same type of preparation was used in the western blot experiments. (c) Increased GluA1 immunoreactivity in CBCs from Unpaired and Paired animals ( $N=5$  each) compared to CBCs from Naïve animals ( $N=5$ ). Although an ANOVA did not identify a source of significant difference among the 3 groups, there is a tendency for both the Unpaired and Paired values to be higher compared to the Naïve value.

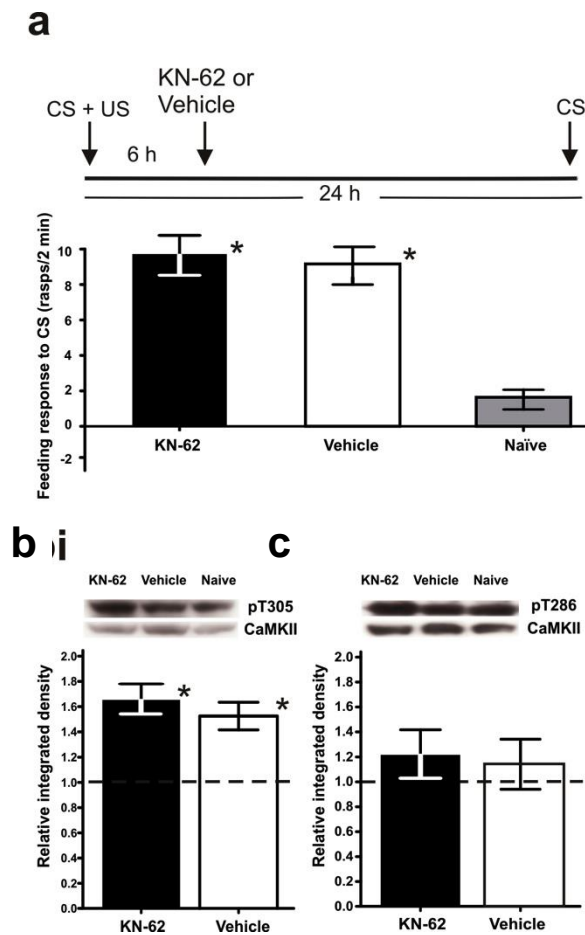

**Supplementary Figure 4. KN-62 treatment at 6 h after classical conditioning does not affect ongoing memory consolidation or the learning-induced phosphorylation state of CaMKII in *Lymnaea*.** (a) Results of the 24 h memory test conducted concurrently with the biochemical assays shown in b. Timeline for the experiment is shown above the diagram. At the 24 h test with the CS, both the classically conditioned and 6 h later KN-62 treated ( $N=61$ ) and the classically conditioned and 6 h later vehicle-treated animals ( $N=62$ ) showed a significantly higher (asterisks) feeding response to the CS compared to the Naïve animals ( $N=53$ ). ANOVA:  $P<0.0001$ . Tukey's tests: KN-62 versus Naïve and Vehicle versus Naïve, both  $P<0.05$ ; KN-62 versus Vehicle,  $P>0.05$ . (b) KN-62 treatment at 6 h after classical conditioning has no effect on the learning-induced phosphorylation state of CaMKII. Examples of pT305-CaMKII, pT286-CaMKII and CaMKII western blot bands from the same KN-62 treated, Vehicle treated and Naïve samples (each containing protein extracts from the buccal and cerebral ganglia and cerebro-buccal connectives of 12 animals) are shown above the graphs. The means ( $\pm$ SEM) of pT305-CaMKII (b) or pT286-CaMKII (c) over CaMKII levels are shown (relative integrated density). The values thus calculated for KN-62 treated samples (b,  $N=6$ ; c,  $N=6$ ) and Vehicle treated samples (b,  $N=6$ ; c,  $N=6$ ) were normalized to the mean of the density values obtained from naïve samples (b,  $N=14$ ; c,  $N=12$ ), providing a baseline of 1 (dashed line). Both KN-62 and Vehicle treatment 6 h after paired training leave the significantly higher than baseline level (increased by training, see Fig. 6a), of pT305-CaMKII unaffected (b). Asterisks indicate significant differences compared to the naïve baseline. One sample t tests for data in b: KN-62 versus naïve baseline,  $P<0.009$ ; Vehicle versus naïve baseline,  $P<0.02$ . There is no statistically significant difference between the normalized data from the KN-62 and Vehicle group (two-sample t-test,  $P=0.15$ ). T286 phosphorylation remains unaffected by paired training (also see Fig. 6b) and also by treatment with either KN-62 or vehicle (c). One sample t tests for data in c: KN-62 versus naïve baseline,  $P=0.45$ ; Vehicle versus naïve baseline,  $P=0.23$ . There is no statistically significant difference (Two-sample t-test,  $P=0.92$ ) between the normalized data from the KN-62 and Vehicle group either.

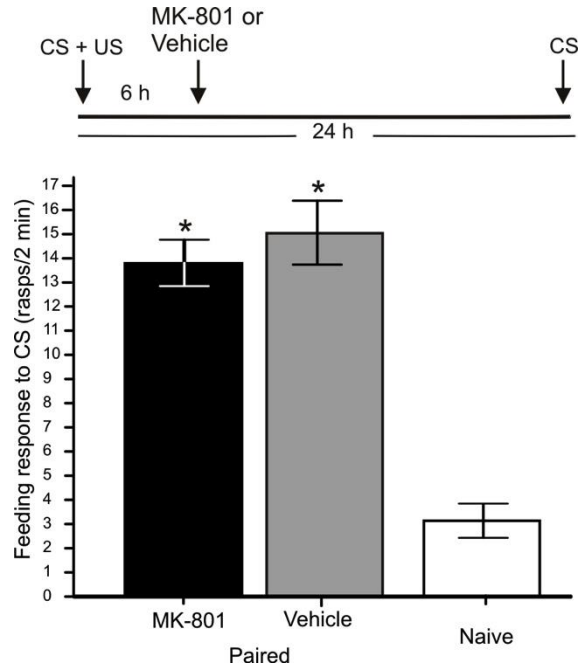

**Supplementary Figure 5. Blocking NMDA receptors at 6 h after classical conditioning does not affect ongoing memory consolidation in *Lymnaea*.** Results of the 24 h memory test are shown with the timeline for the experiment above the diagram. Means ( $\pm$ SEM) are shown. At the 24 h test with the CS, both the classically conditioned and 6 h later MK-801 treated ( $N=32$ ) and the classically conditioned and 6 h later vehicle-treated animals ( $N=32$ ) showed a significantly higher (asterisks) feeding response to the CS compared to the Naïve animals ( $N=32$ ). One-way ANOVA:  $P<0.0001$ . Tukey's tests: MK-801 vs Naive and Vehicle versus Naive, both  $P<0.05$ ; MK-801 versus Vehicle,  $P>0.05$ .

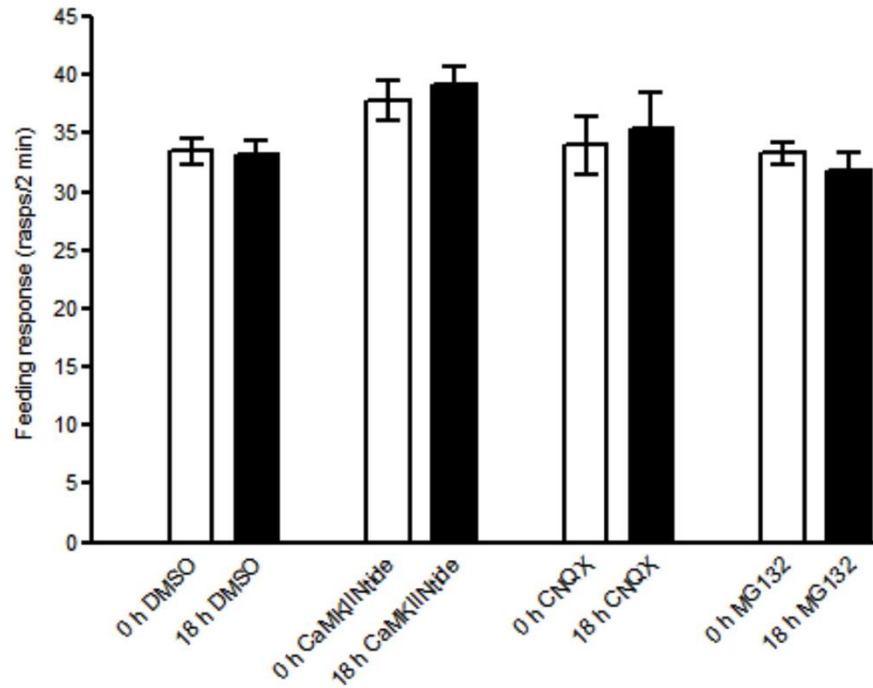

**Supplementary Figure 6. CaMKIIIntide, CNQX or MG132 do not affect the ability of animals to generate a full feeding motor program at 18 h post-treatment.** The 18 h post-injection time was used because in the learning experiments drugs were injected at 6 h post-training and the feeding response to the CS was tested at 24 h post-training. Six hours after testing them for their feeding response to sucrose, animals ( $N=10$  in each group) were injected with CaMKIIIntide ( $4 \mu\text{M}$  final concentration), CNQX ( $20 \mu\text{M}$  final concentration), MG132 ( $1 \mu\text{M}$  final concentration) or DMSO in saline (vehicle, 0.2% final concentration). Eighteen hours after the administration of the drugs and the vehicle, respectively, animals from each group were re-tested for their feeding response to sucrose. These tests revealed normal feeding responses in all drug-treated groups (paired t-tests,  $P$  values between 0.17 and 0.86), confirming that neither the drugs nor the vehicle affected the animals' ability to generate a full feeding motor program in response to the appropriate sensory stimulus. Means ( $\pm$ SEM) are shown.

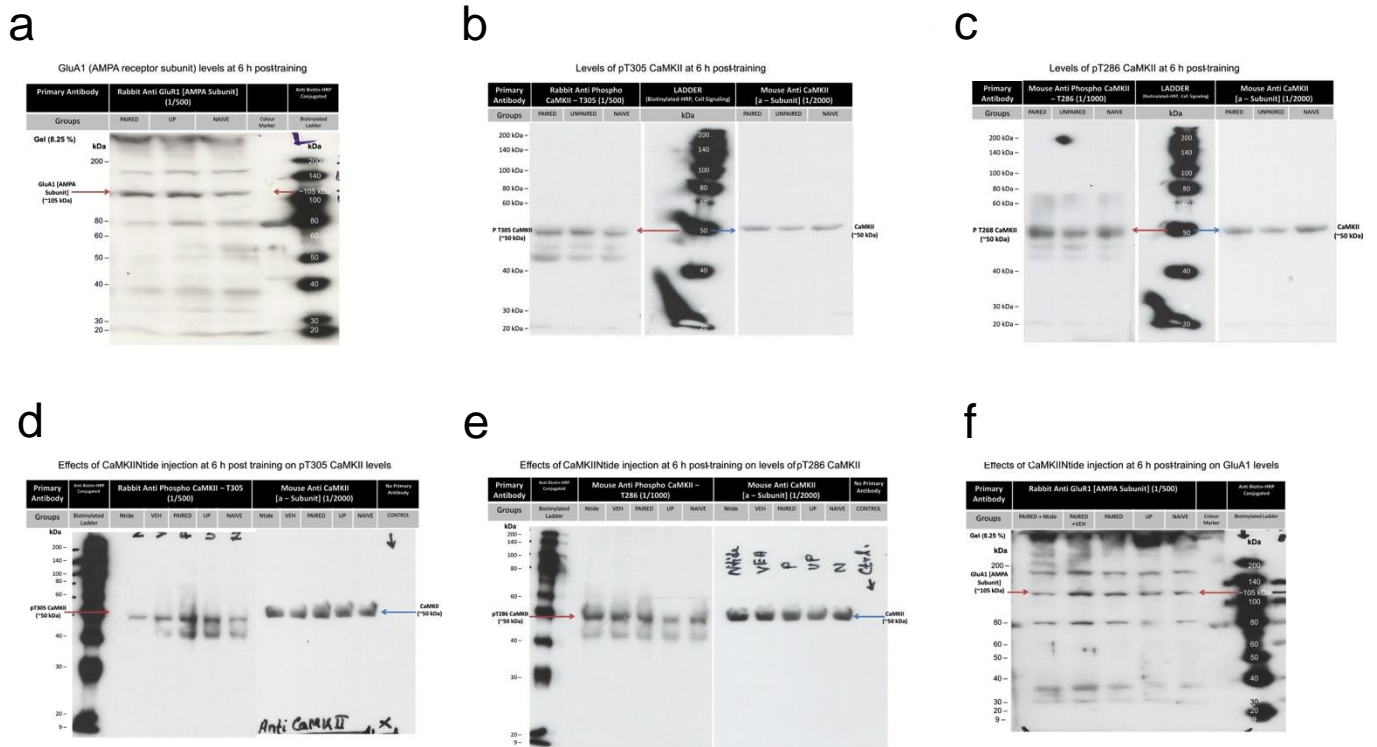

**Supplementary Figure 7.** Full-length blots for the example immunoblot images shown in Fig. 2 (a), Fig. 6a and b, respectively (b, c), Fig. 7b and c, respectively (d, e) and Fig. 8 (f).

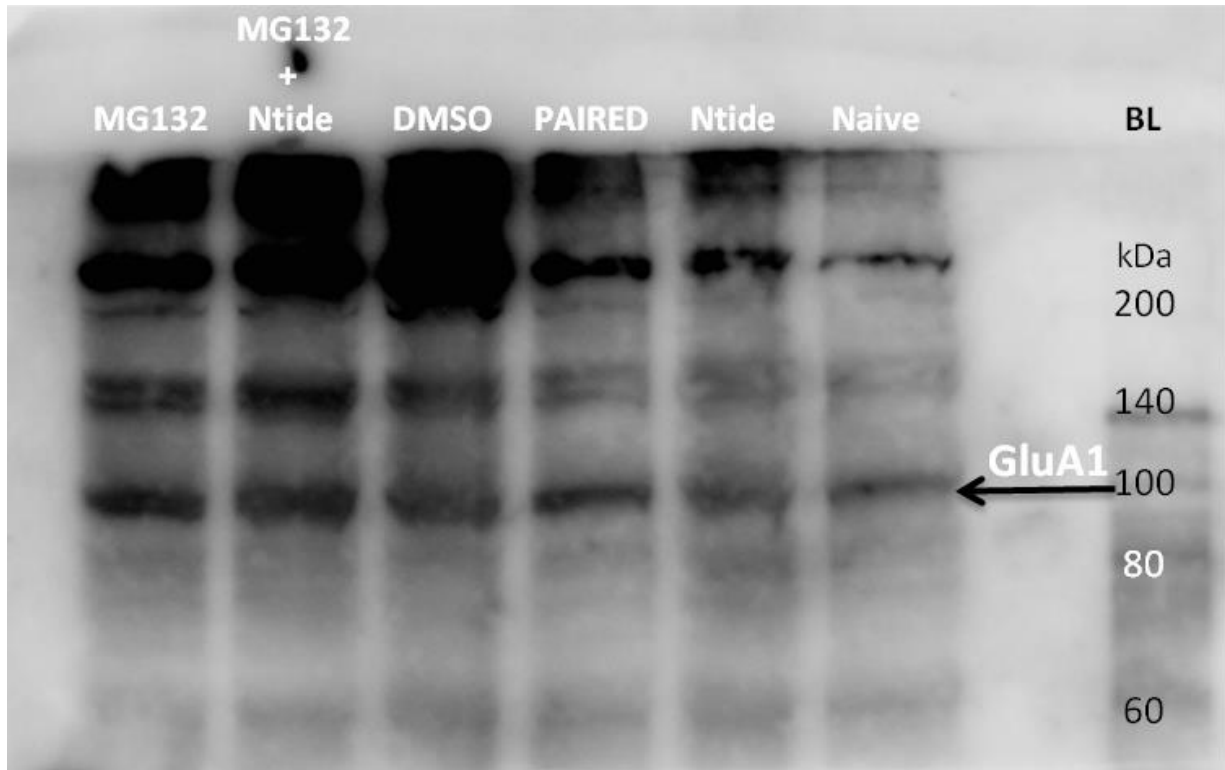

**Supplementary Figure 8. Full-length blot for the example immunoblot image shown in Fig. 9b.** Please note that the left-to-right order of the bands was re-arranged in Fig. 9b to match the order in which the behavioral data are presented in Fig. 9a.



**Supplementary References**

1. Hutton, M.L., Harvey, R.J., Barnard, E.A. & Darlison, M.G. Cloning of a cDNA that encodes an invertebrate glutamate receptor subunit. *FEBS Lett.* 292, 111-114. (1991).
2. Stuhmer, T., Amar, M., Harvey, R.J., Bermudez, I., Minnen, J.V. & Darlison, M.G. Structure and pharmacological properties of a molluscan glutamate-gated cation channel and its likely role in feeding behavior. *J. Neurosci.* 16, 2869-2880 (1996).
